# Supplementary material for: Universal route to fabricate facile and flexible micro-supercapacitors with gold-coated silver electrodes
Source: Royal Society of Chemistry journal article supplement (doi:10.1039/c6ra13432g), 2016-01-01
Supplement: c6ra13432g1.pdf [file c6ra13432g1.pdf]

## Supporting Information

### **Universal Route to Fabricate the Facile and Flexible Micro-supercapacitors with Gold-coated Silver Electrodes**

*Yizhen Yu, Jian Zhang\*, Wu Zhang, Ruili Liu, Xing Wu and Ziqiang Zhu*

#### **Calculation**

The capacitance values of Au @ Ag electrodes can be calculated from the CV data according to the following equation :

$$C_{cell} = I/(dV/dt)$$

Where I refers to the mean current in the CV curves and the discharge current in the CP; dV/dt refers to the scan rate in CV curves and the potential window divided by the discharge time. The area capacitance can be calculated from both CV data and CP data.

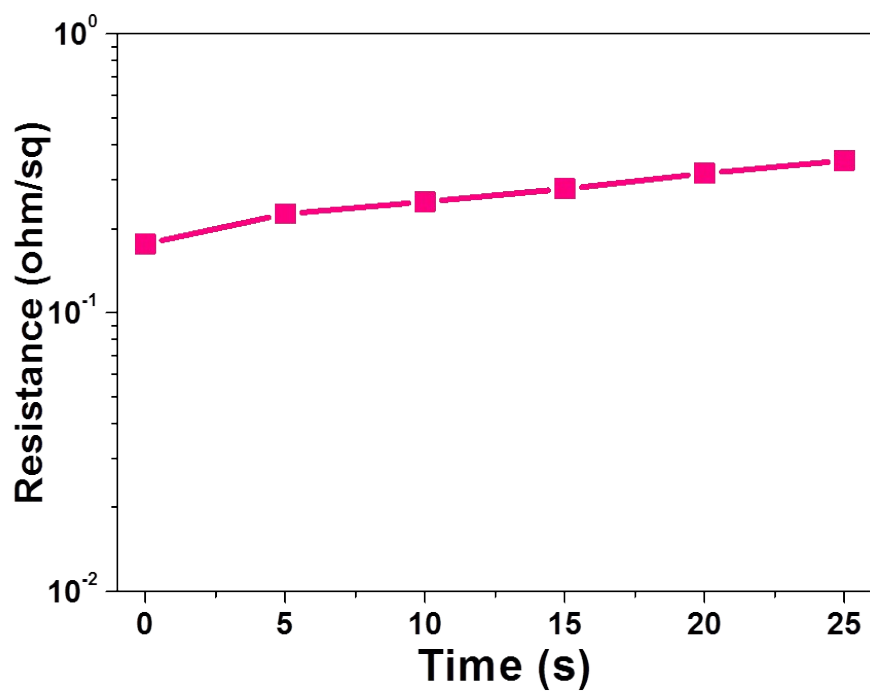

**Fig. S1.** A plot of the square resistance at different plating time.

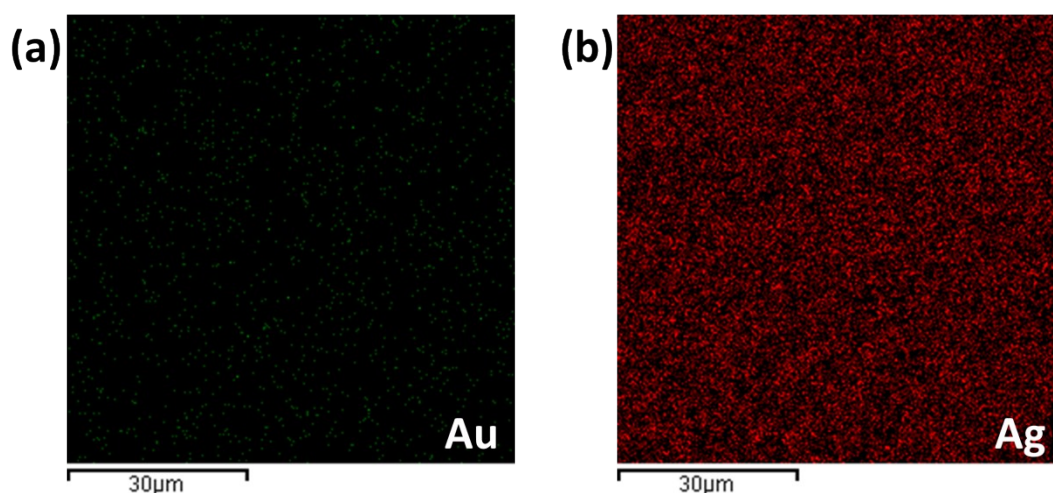

**Fig. S2.** (a-b) EDS mapping image of Au and Ag on Ag@Au MCCs

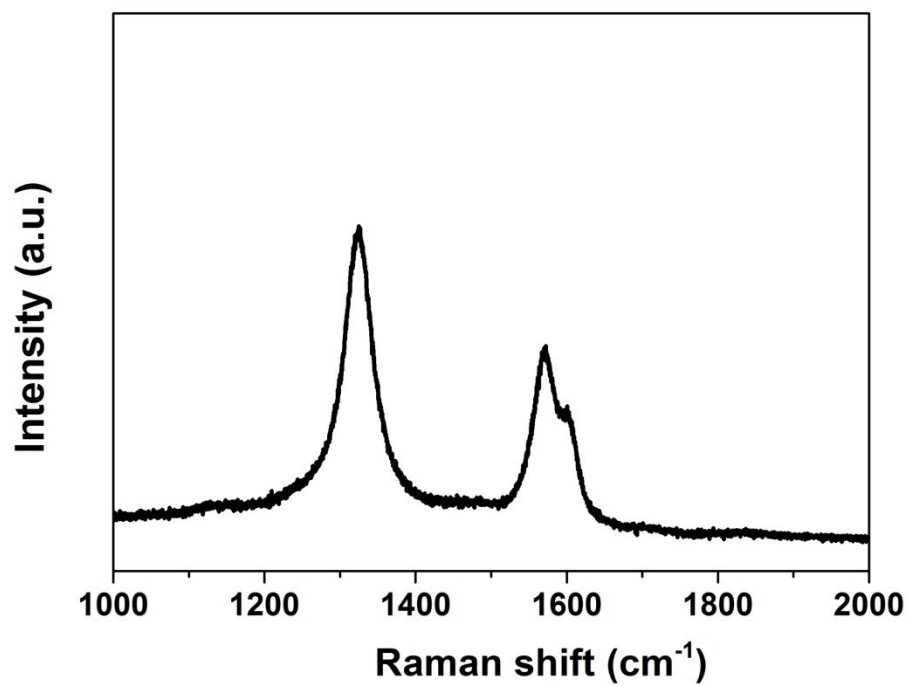

**Fig. S3.** Raman spectra of MWNTs

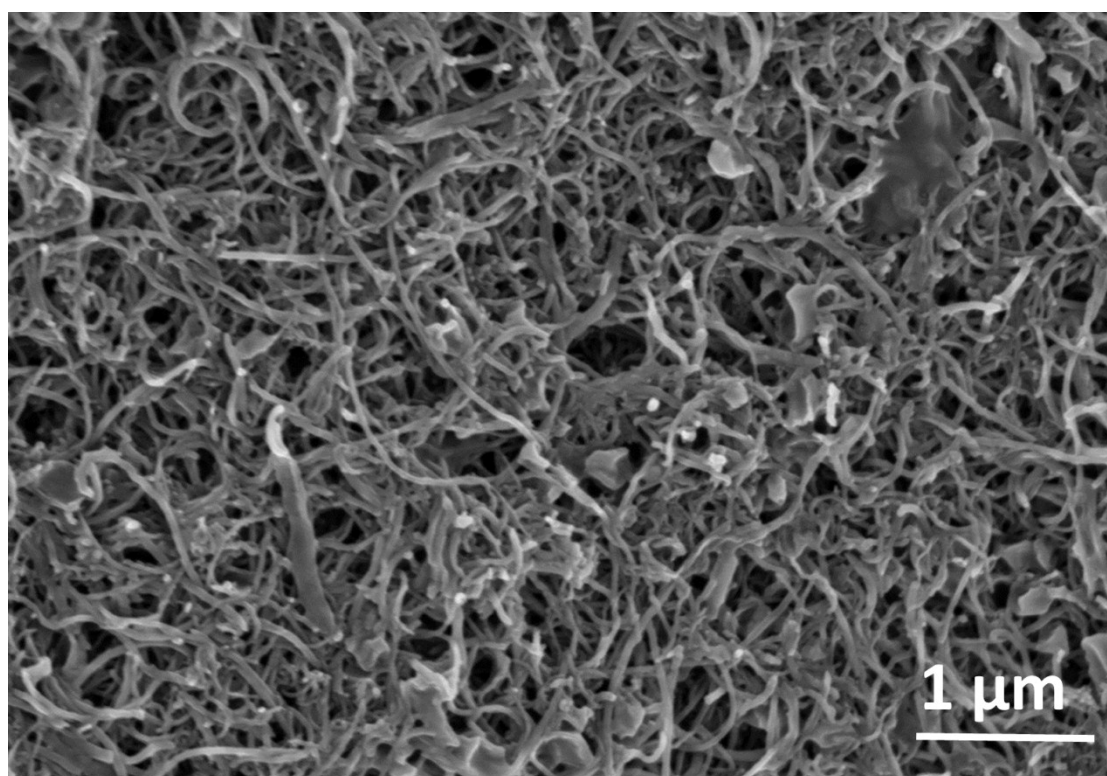

**Fig. S4.** SEM image of MWNTs

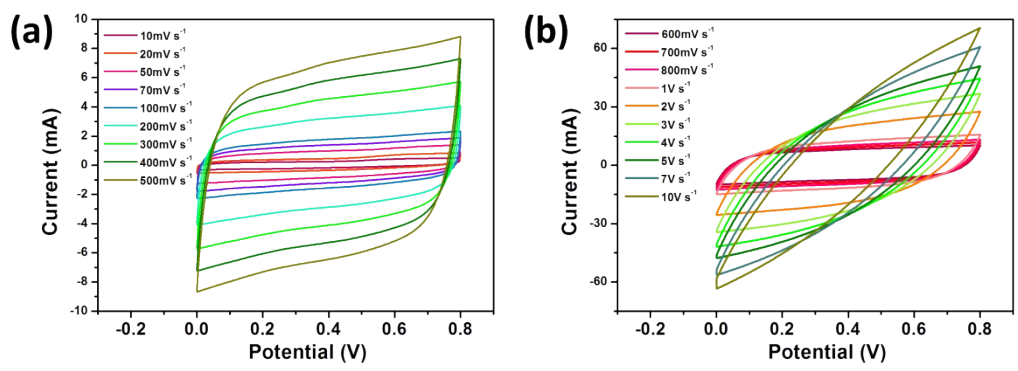

Fig. S5. (a-b) CV curves of Ag@Au MSCs at different scan rate of 10 mV s<sup>-1</sup> to 10 V s<sup>-1</sup>

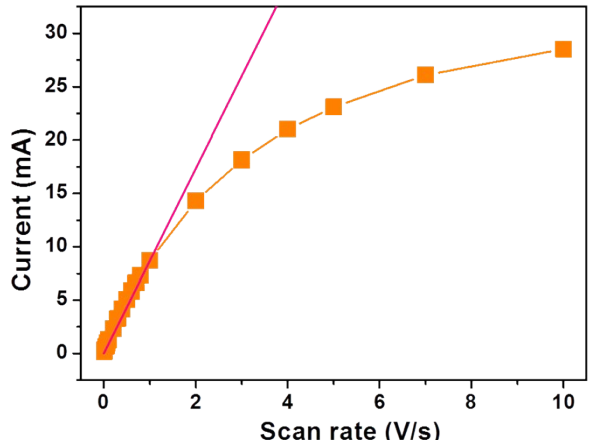

Fig. S6. A plot of the discharge current as a function of the scan rate.

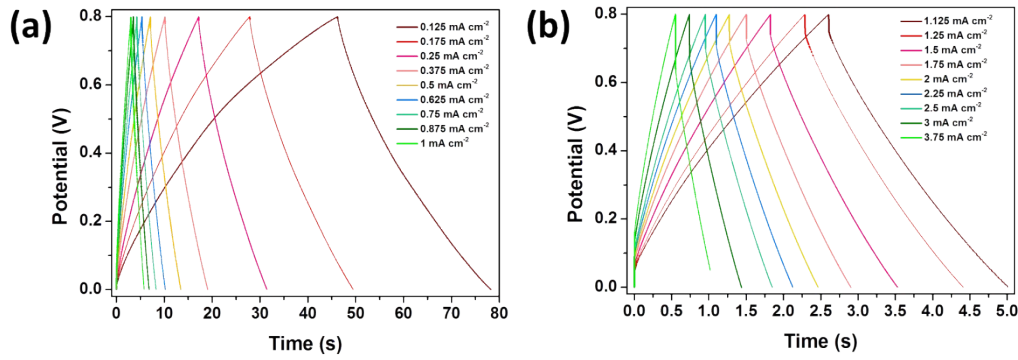

Fig. S7. (a-b) Galvanostatic charge/discharge curves of Ag@Au MSCs at different current density of 0.125 to 3.75 mA cm<sup>-2</sup>.

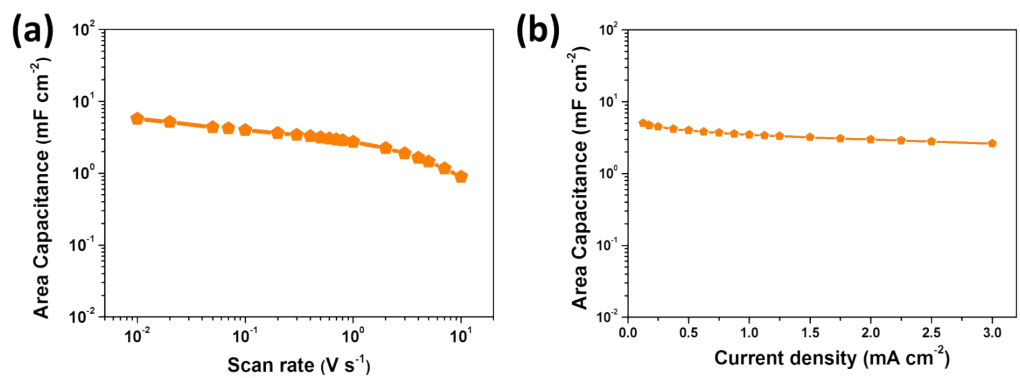

**Fig. S8.** (a-b) Area capacitances calculated from CV curves and galvanostatic charge/discharge curves
